# Supplementary material for: Sex differences in allostatic load trajectories among midlife and older adults: Evidence from the China health and retirement longitudinal study
Source: PubMed Central journal article supplement (PMC11670931; doi:10.1371/journal.pone.0315594), 2024-12-26
Supplement: pone.0315594.s002.pdf [file pone.0315594.s002.pdf]

**S2 Table: Descriptive summaries of samples from 2011 survey (baseline) and 2015 survey**

|                             | Baseline Survey (Wave 1) |              |              |       | 2015 Survey (Wave 4) |              |              |       |
|-----------------------------|--------------------------|--------------|--------------|-------|----------------------|--------------|--------------|-------|
|                             | N (%)                    | Female (%)   | Male (%)     | .p    | N (%)                | Female (%)   | Male (%)     | .p    |
| <b>Gender</b>               | 7144                     | 3836 (53.70) | 3308 (46.30) |       | 7144                 | 3836 (53.70) | 3308 (46.30) |       |
| <b>Age Group</b>            | 7143                     | 3835         | 3308         | 0.000 | 7143                 | 3835         | 3308         | 0.000 |
| 49 or younger               | 1327 (18.85)             | 820 (21.38)  | 507 (15.33)  |       | 177 (2.48)           | 109 (2.84)   | 68 (2.06)    |       |
| 50-59                       | 2638 (36.93)             | 1444 (37.65) | 1194 (36.04) |       | 2506 (35.08)         | 1459 (38.04) | 1047 (31.65) |       |
| 60-69                       | 2256 (31.58)             | 1133 (29.54) | 1123 (33.95) |       | 2877 (40.28)         | 1505 (39.24) | 1372 (41.48) |       |
| 70-79                       | 820 (11.48)              | 384 (10.01)  | 436 (13.18)  |       | 1293 (18.10)         | 621 (16.19)  | 672 (20.31)  |       |
| 80 or older                 | 102 (1.43)               | 54 (1.41)    | 48 (1.45)    |       | 290 (4.06)           | 141 (3.68)   | 149 (4.50)   |       |
| <b>Residence Type</b>       | 7138                     | 3833         | 3305         | 0.000 | 6845                 | 3677         | 3168         | 0.000 |
| Agricultural (Rural)        | 5974 (83.69)             | 3280 (85.57) | 2694 (81.85) |       | 5431 (79.34)         | 2986 (81.21) | 2445 (77.18) |       |
| Non-agricultural (Urban)    | 1130 (15.83)             | 535 (13.96)  | 595 (18.00)  |       | 1356 (19.81)         | 658 (17.90)  | 698 (22.03)  |       |
| Others (Unified)            | 34 (0.48)                | 18 (0.47)    | 16 (0.48)    |       | 58 (0.58)            | 33 (0.90)    | 25 (0.79)    |       |
| <b>Marital Status</b>       | 7140                     | 3833         | 3307         | 0.000 | 7143                 | 3836         | 3307         | 0.000 |
| not married or separated    | 1088 (15.24)             | 693 (18.08)  | 395 (11.94)  |       | 1303 (18.24)         | 857 (22.34)  | 446 (13.49)  |       |
| married                     | 6052 (84.76)             | 3140 (81.92) | 2912 (88.06) |       | 5840 (81.76)         | 2979 (77.66) | 2861 (86.51) |       |
| <b>Wealth Tertiles</b>      | 6871                     | 3704         | 3167         | 0.101 | 6871                 | 3704         | 3167         | 0.101 |
| Very or relatively rich     | 185 (2.69)               | 91 (2.46)    | 94 (2.97)    |       | 185 (2.69)           | 91 (2.46)    | 94 (2.97)    |       |
| Average                     | 3628 (52.80)             | 1995 (53.86) | 1633 (51.56) |       | 3628 (52.80)         | 1995 (53.86) | 1633 (51.56) |       |
| Poor or relatively poor     | 3058 (44.51)             | 1618 (43.68) | 1440 (45.47) |       | 3058 (44.51)         | 1618 (43.68) | 1440 (45.47) |       |
| <b>Education Background</b> | 7135                     | 3830         | 3305         | 0.000 | 6719                 | 3625         | 3094         | 0.000 |
| Elementary or lower         | 5002 (70.11)             | 3009 (78.56) | 1993 (60.30) |       | 4708 (70.07)         | 2844 (78.46) | 1864 (60.25) |       |
| Middle school               | 1452 (20.35)             | 573 (14.96)  | 879 (26.60)  |       | 1364 (20.30)         | 539 (14.87)  | 825 (26.66)  |       |
| High school                 | 469 (6.57)               | 190 (4.96)   | 279 (8.44)   |       | 449 (6.68)           | 185 (5.10)   | 264 (8.53)   |       |
| College or higher           | 212 (2.97)               | 58 (1.51)    | 154 (4.66)   |       | 198 (2.95)           | 57 (1.57)    | 141 (4.56)   |       |
| <b>Num. Comorbidities</b>   | 6798                     | 3645         | 3153         | 0.004 | 6798                 | 3645         | 3153         | 0.004 |
| 0                           | 2137 (31.44)             | 1092 (29.96) | 1045 (33.14) |       | 2137 (31.44)         | 1092 (29.96) | 1045 (33.14) |       |
| 1                           | 2029 (29.85)             | 1079 (29.60) | 950 (30.13)  |       | 2029 (29.85)         | 1079 (29.60) | 950 (30.13)  |       |
| 2                           | 1354 (19.92)             | 741 (20.33)  | 613 (19.44)  |       | 1354 (19.92)         | 741 (20.33)  | 613 (19.44)  |       |
| 3 or more                   | 1278 (18.80)             | 733 (20.11)  | 545 (17.29)  |       | 1278 (18.80)         | 733 (20.11)  | 545 (17.29)  |       |
| <b>Smoking Behaviours</b>   | 7023                     | 3814         | 3209         | 0.000 | 7139                 | 3836         | 3303         | 0.000 |
| Still have                  | 2112 (30.07)             | 225 (5.90)   | 1533 (46.50) |       | 1928 (27.01)         | 205 (5.34)   | 1723 (52.16) |       |
| Quit or never               | 4911 (69.93)             | 3589 (94.10) | 1322 (41.20) |       | 5211 (72.99)         | 3631 (94.66) | 1580 (47.84) |       |
| <b>Drinking Behaviours</b>  | 7120                     | 3823         | 3297         | 0.000 | 7139                 | 3834         | 3305         | 0.000 |
| More than Once a Month      | 1801 (25.29)             | 268 (7.01)   | 1533 (46.50) |       | 1813 (25.40)         | 301 (7.85)   | 1512 (45.75) |       |
| Less than Once a Month      | 570 (8.01)               | 186 (4.87)   | 384 (11.65)  |       | 597 (8.36)           | 247 (6.44)   | 350 (10.59)  |       |
| Don't drink                 | 4749 (66.70)             | 3369 (88.12) | 1380 (41.86) |       | 4729 (66.24)         | 3286 (85.71) | 1443 (43.66) |       |
| <b>Physical activities</b>  | 2979                     | 1665         | 1314         | 0.000 | 3518                 | 1900         | 1618         | 0.000 |
| No                          | 1892 (63.51)             | 1159 (69.61) | 733 (55.78)  |       | 2268 (64.47)         | 1325 (69.74) | 943 (58.28)  |       |
| Yes                         | 1087 (36.49)             | 506 (30.39)  | 581 (44.22)  |       | 1250 (35.53)         | 575 (30.26)  | 675 (41.72)  |       |
