# Supplementary material for: Sex differences in allostatic load trajectories among midlife and older adults: Evidence from the China health and retirement longitudinal study
Source: PubMed Central journal article supplement (PMC11670931; doi:10.1371/journal.pone.0315594), 2024-12-26
Supplement: pone.0315594.s003.pdf [file pone.0315594.s003.pdf]

**S3 Table: Maximum likelihood estimates for allostatic load: coefficients and standard errors**

|                                                 | <b>Model E</b>     | <b>Model F</b>     | <b>Model G</b>    | <b>Model H</b>    |
|-------------------------------------------------|--------------------|--------------------|-------------------|-------------------|
| <b>Age</b>                                      | 0.001 ± 0.003      | -0.010 ± 0.003 **  | -0.005 ± 0.004    | -0.008 ± 0.001*** |
| <b>Sex</b> (ref = male)                         | -0.536 ± 0.214 *   | -0.647 ± 0.304*    | -0.768 ± 0.294 ** | -0.636 ± 0.081*** |
| <b>Age*gender</b>                               | 0.007 ± 0.004 †    | 0.009 ± 0.004*     | 0.011 ± 0.005 *   | 0.009 ± 0.001***  |
| <b>Residence</b> (ref = urban)                  | -0.014 ± 0.027     | 0.026 ± 0.032      | 0.031 ± 0.052     | 0.018 ± 0.015     |
| <b>Married</b> (ref = yes)                      | 0.064 ± 0.030 *    | -0.070 ± 0.016 *   | 0.021 ± 0.053     | 0.027 ± 0.015†    |
| <b>Education</b><br>(ref = primary school)      | 0.015 ± 0.017      | 0.027 ± 0.022      | 0.022 ± 0.021     | 0.008 ± 0.009     |
| <b>Wealth</b> (ref = wealthiest)                | -0.076 ± 0.023**   | -0.015 ± 0.026     | -0.062 ± 0.023 ** | -0.014 ± 0.010    |
| <b>Num. Comorbidities</b> (ref = 0)             | 0.122 ± 0.010 ***  | 0.091 ± 0.012 ***  | 0.121 ± 0.012 *** | 0.054 ± 0.005 *** |
| <b>Current Smoker</b> (ref = yes)               | -0.050 ± 0.027 †   | -0.047 ± 0.031     | -0.055 ± 0.046    | -0.044 ± 0.014 ** |
| <b>Drink more than once a month</b> (ref = yes) | 0.025 ± 0.024      | 0.029 ± 0.033      | 0.053 ± 0.050     | 0.049 ± 0.013***  |
| <b>Vigorous Exercise</b> (ref = yes)            | -0.137 ± 0.025 *** | -0.167 ± 0.026 *** | -0.095 ± 0.035 ** | -0.056 ± 0.011*** |
| <i>Constant</i>                                 | 1.588 ± 0.496 ***  | 1.966 ± 0.238 ***  | 1.588 ± 0.496 *** | 0.498 ± 0.075***  |

Model E: AL defined by clinical cut-points and top quartile with MI (age cohort: 45-65): interaction random-intercept model.

Model F: AL defined by clinical cut-points and top quartile with MI (age cohort: 65 or older): interaction random-intercept model.

Model G: AL defined by clinical cut-points and top quartile with IPW: interaction random-intercept model.

Model H: AL defined by z-scores with IPW: interaction random-intercept model.

ref, reference. sig: †<0.1; \*<0.05; \*\*<0.01; \*\*\*<0.001.
