# Supplementary material for: Sex differences in allostatic load trajectories among midlife and older adults: Evidence from the China health and retirement longitudinal study
Source: PubMed Central journal article supplement (PMC11670931; doi:10.1371/journal.pone.0315594), 2024-12-26

### S1 Fig: Predicted trajectories of allostatic load by gender: interaction models

(a) Weighted Interaction Model (Model G)

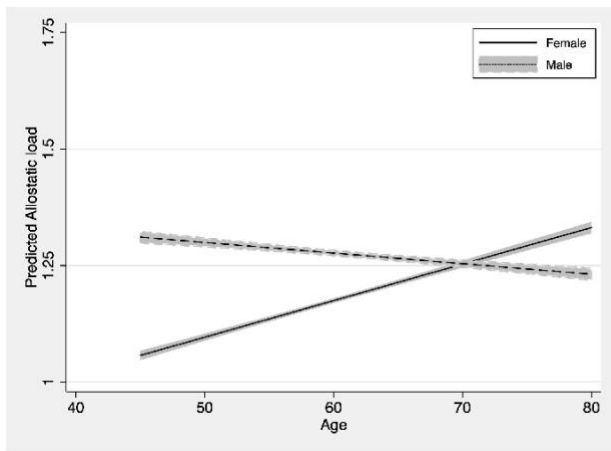

(b) Weighted Interaction Model (Model H)

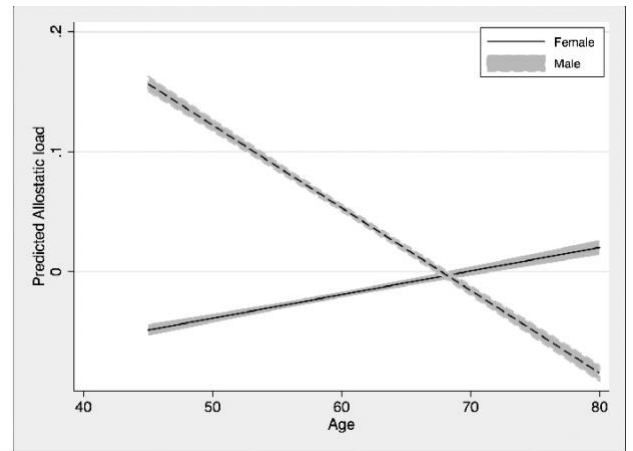

Supplement: pone.0315594.s004.pdf [file pone.0315594.s004.pdf]
