# Supplementary material for: Sex differences in allostatic load trajectories among midlife and older adults: Evidence from the China health and retirement longitudinal study
Source: PubMed Central journal article supplement (PMC11670931; doi:10.1371/journal.pone.0315594), 2024-12-26
Supplement: pone.0315594.s006.pdf [file pone.0315594.s006.pdf]

**S3 Fig: Predicted trajectories of allostatic load by gender: unbalanced data**

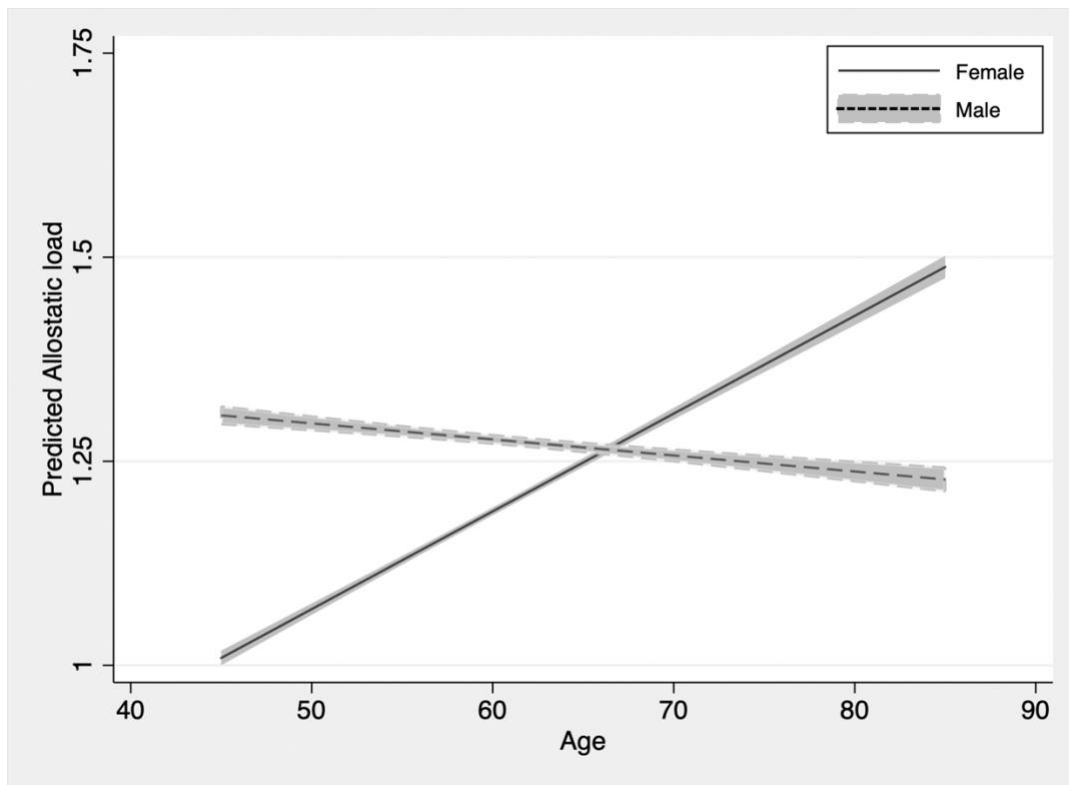

Note: AL is defined by clinical cut-off points, Multiple Imputation applied.
