# Supplementary material for: Sex differences in allostatic load trajectories among midlife and older adults: Evidence from the China health and retirement longitudinal study
Source: PubMed Central journal article supplement (PMC11670931; doi:10.1371/journal.pone.0315594), 2024-12-26
Supplement: pone.0315594.s007.pdf [file pone.0315594.s007.pdf]

## STROSA (version 2) Checklist

| Item                                | Criterion                          | Availability of criteria Manuscript                                                                                                                                                                                                                           |
|-------------------------------------|------------------------------------|---------------------------------------------------------------------------------------------------------------------------------------------------------------------------------------------------------------------------------------------------------------|
| <b>Title, abstract and keywords</b> |                                    |                                                                                                                                                                                                                                                               |
| 1                                   | Title and abstract                 | Page 1-2                                                                                                                                                                                                                                                      |
| 2                                   | Keywords                           | Page 2                                                                                                                                                                                                                                                        |
| <b>Introduction</b>                 |                                    |                                                                                                                                                                                                                                                               |
| 3                                   | Background and rationale           | Page 3-5                                                                                                                                                                                                                                                      |
| 4                                   | Aim of the study                   | Page 5                                                                                                                                                                                                                                                        |
| <b>Methods</b>                      |                                    |                                                                                                                                                                                                                                                               |
| 5                                   | Study design                       | Page 6, first paragraph                                                                                                                                                                                                                                       |
| 6                                   | Data source                        | Page 6, “data source and study sample”                                                                                                                                                                                                                        |
| 7                                   | Legal foundation                   | Page 7, “ethical consideration”                                                                                                                                                                                                                               |
| 8                                   | Data privacy                       | Page 7, “ethical consideration”                                                                                                                                                                                                                               |
| 9                                   | Data flow                          | Page 6, “data source and study sample”                                                                                                                                                                                                                        |
| 10                                  | Inclusion and exclusion criteria   | Page 6, “data source and study sample”: we describe the inclusion criteria of a balanced dataset across two waves.<br>Page 7, “evaluation of allostatic load”: we describe the inclusion (biomarker availability) and exclusion (use of medication) criteria. |
| 11                                  | Unit of Analysis                   | Page 6, “data source and study sample”                                                                                                                                                                                                                        |
| 12                                  | Variables                          | Page 8, “covariates”.<br>Table S1 in supporting information.                                                                                                                                                                                                  |
| 13                                  | Sample Size                        | Page 6, “data source and study sample”                                                                                                                                                                                                                        |
| 14                                  | Statistical analysis               | Page 9-11. “Statistical Strategies”                                                                                                                                                                                                                           |
| <b>Results</b>                      |                                    |                                                                                                                                                                                                                                                               |
| 15                                  | Selection of study population      | Page 12                                                                                                                                                                                                                                                       |
| 16                                  | Descriptive results                | Page 12                                                                                                                                                                                                                                                       |
| 17                                  | Main results                       | Page 13-16                                                                                                                                                                                                                                                    |
| 18                                  | Further results                    | Page 13-16                                                                                                                                                                                                                                                    |
| <b>Discussion</b>                   |                                    |                                                                                                                                                                                                                                                               |
| 19                                  | Main results                       | Page 16-17                                                                                                                                                                                                                                                    |
| 20                                  | Internal validity and risk of bias | Page 18                                                                                                                                                                                                                                                       |
| 21                                  | Strengths and limitations          | Page 19-20                                                                                                                                                                                                                                                    |
| 22                                  | Interpretation                     | Page 16-19                                                                                                                                                                                                                                                    |
| 23                                  | Transferability                    | Page 20-21                                                                                                                                                                                                                                                    |
| <b>Conclusion</b>                   |                                    |                                                                                                                                                                                                                                                               |
| 24                                  | Conclusion                         | Page 21                                                                                                                                                                                                                                                       |
| <b>Conflict of interest</b>         |                                    |                                                                                                                                                                                                                                                               |
| 25                                  | Funding                            | There is no funding support this study.                                                                                                                                                                                                                       |
| 26                                  | Role of Data owner(s)              | CHARLS is an open-source dataset. The owner (Peking University) has no influence on the implementation and presentation of the study.                                                                                                                         |
| 27                                  | Other conflict of interest         | There were no other conflicts of interest; the evaluation was conducted independently.                                                                                                                                                                        |
